# Supplementary material
Source: publisher figshare collection journal article supplement (https://acs.figshare.com/ndownloader/files/5162152)
Supplement: Supplementary file 1 [file 5162152]

## SUPPORTING INFORMATION

**One-Pot Homolytic Aromatic Substitution/HWE-Olefinations under Microwave Conditions for the Formation of a Small Oxindole Library**

Antje Teichert,<sup>a</sup> Katja Jantos,<sup>a</sup> Klaus Harms,<sup>a</sup> and Armido Studer<sup>a,b\*</sup>

<sup>a</sup>Fachbereich Chemie, Philipps-Universität Marburg, 35032 Marburg, Germany. <sup>b</sup>Organisch-Chemisches Institut, Westfälische Wilhelms-Universität Münster, Corrensstrasse 40, 48149 Münster, Germany.

**General.** <sup>1</sup>H and <sup>13</sup>C-NMR spectra were recorded on a Bruker ARX 300 and ARX 200. Chemical shifts  $\delta$  in ppm rel. to SiMe<sub>4</sub> as an internal standard. TLC: Merck silica gel 60 F<sub>254</sub> plates; detection with UV or dipping into a soln. of KMnO<sub>4</sub> (6.0 g), NaHCO<sub>3</sub> (20.0 g) and H<sub>2</sub>O (800 mL) or a soln. of Ce(SO<sub>4</sub>)<sub>2</sub>·H<sub>2</sub>O (10.0 g), phosphormolybdic acid hydrate (25.0 g), conc. H<sub>2</sub>SO<sub>4</sub> (60 mL) and H<sub>2</sub>O (940 mL), followed by heating. FC: Merck or Fluka silica gel 60 (40 – 63  $\mu$ m) at *ca.* 0.4 bar. IR spectra were recorded on an IR 750 (*Nicolet Magna*) or a IFS-200 (*Bruker*). MS: Recorded on a VG Tribid, Varian CH7 (EI); IonSpec Ultima, Finnigan MAT TSQ 700 or a Finnigan MAT 95S (ESI) in *m/z* (% of basis peak). Melting points: Büchi Kofler apparatus; uncorrected. Microwave assisted heating was performed in an MLS-Ethos 1600 Microwave System (*MLS*). Solvents were purified by standard methods. Compounds sensitive to air and moisture were handled under argon using *Schlenk* techniques.

**(Diethoxyphosphoryl)acetic acid**

According to Patel *et al.*<sup>[1]</sup> ethyl (diethoxyphosphoryl)acetate (4.40 mL, 22.3 mmol) was added dropwise to 1 M NaOH (22.5 mL). After stirring for 3 h at RT, EtOH was partially evaporated and the reaction mixture was treated with 2 N HCl (until pH 1). The aqueous layer was extracted with CH<sub>2</sub>Cl<sub>2</sub>. The combined organic layers were washed with brine dried over anhydrous MgSO<sub>4</sub>. The solvent was removed *in vacuo* to yield (diethoxyphosphoryl)acetic acid (3.36 g, 77%) as a greenish oil. <sup>1</sup>H-NMR (200 MHz, CDCl<sub>3</sub>):  $\delta$  = 10.79 (*s*, 1 H, OH); 4.27-4.12 (*m*, 4 H, OCH<sub>2</sub>); 2.97 (*d*, *J* = 21.7, 2 H, PCH<sub>2</sub>); 1.34 (*t*, *J* = 7.0, 6 H, CH<sub>3</sub>). The acid was used for the subsequent reaction without further purification.

### **(Diethoxyphosphoryl)acetic acid chloride **4****

According to Fryxell *et al.*<sup>[2]</sup> (diethoxyphosphoryl)acetic acid (2.00 g, 10.20 mmol) was added dropwise to thionyl chloride (3.20 mL, 43.63 mmol). After stirring for 4 h at RT, the excess thionyl chloride was evaporated to give **4** (2.10 g, 96%). <sup>1</sup>H-NMR (300 MHz, CDCl<sub>3</sub>):  $\delta$  = 4.23 (*dq*,  $J_1 = 7.1$ ,  $J_2 = 1.3$ , 4 H, OCH<sub>2</sub>); 3.50 (*d*,  $J = 21.2$ , 2 H, PCH<sub>2</sub>); 1.38 (*t*,  $J = 7.1$ , 6 H, CH<sub>3</sub>). The compound was used without further purification.

### ***p*-Methoxy-*N*-methylaniline**

According to Barluenga *et al.*<sup>[3,4]</sup> *p*-anisidin (1.00 g, 8.12 mmol) was added to a suspension of NaOMe (2.18 g, 40.6 mmol) in MeOH (12 mL). The resulting brown solution was poured into a suspension of paraformaldehyde (340 mg, 11.36 mmol) in MeOH (8 mL). The reaction mixture was stirred for 5 h at RT and then NaBH<sub>4</sub> (306 mg, 8.12 mmol) was added. The solution was heated to reflux for 1.75 h. After evaporating part of the solvent, the reaction mixture was treated with 1 M KOH. After extraction with MTBE, the organic layer was dried over MgSO<sub>4</sub>. Evaporation of the solvent *in vacuo* and purification by FC (pentane/Et<sub>2</sub>O 1:2) afforded *p*-methoxy-*N*-methylaniline (887 mg, 80%). The spectroscopic data are in agreement with the literature values.<sup>[3,4]</sup>

### ***m*-Methoxy-*N*-methylaniline**

According to Barluenga *et al.*<sup>[3,4]</sup> *m*-anisidine (1.00 g, 8.12 mmol) was added to a suspension of NaOMe (2.18 g, 40.6 mmol) in MeOH (12 mL). The resulting brown solution was poured into a suspension of paraformaldehyde (340 mg, 11.36 mmol) in MeOH (8 mL). The solution was stirred for 5 h at RT and then NaBH<sub>4</sub> (306 mg, 8.12 mmol) was added. The solution was heated to reflux for 1.75 h. After evaporating part of the solvent, the reaction mixture was treated with 1 M KOH. After extraction with MTBE, the organic layer was dried over MgSO<sub>4</sub>. Evaporation of the solvent and purification by FC (pentane/Et<sub>2</sub>O 1:2) afforded *m*-methoxy-*N*-methylaniline (949 mg, 85%) as a brown oil. The spectroscopic data are in agreement with the literature values.<sup>[3,4]</sup>

### ***o*-Methoxy-*N*-methylaniline**

According to Barluenga *et al.*<sup>[3,4]</sup> *o*-anisidine (1.00 g, 8.12 mmol) was added to a suspension of NaOMe (2.18 g, 40.6 mmol) in MeOH (12 mL). The resulting brown solution was poured into a suspension of paraformaldehyde (340 mg, 11.36 mmol) in MeOH (8 mL). The solution

was stirred for 5 h at RT and then NaBH<sub>4</sub> (306 mg, 8.12 mmol) was added. The solution was heated to reflux for 1.75 h. After evaporating part of the solvent, the reaction mixture was treated with 1 M KOH. After extraction with MTBE, the organic layer was dried over MgSO<sub>4</sub>. Evaporation of the solvent and purification by FC (pentane/Et<sub>2</sub>O 1:2) afforded *o*-methoxy-*N*-methylaniline (327 mg, 29%) as a yellow oil. The spectroscopic data are in agreement with the literature values.<sup>[3,4]</sup>

### ***p*-Methoxy-*N*-tosylaniline**

NEt<sub>3</sub> (0.62 mL, 4.46 mmol), DMAP (tip of spatula) and tosyl chloride (850 mg, 4.46 mmol) were added to a solution of *p*-anisidine (500 mg, 4.06 mmol) in CH<sub>2</sub>Cl<sub>2</sub> (20 mL). After stirring for 3 h at RT the reaction mixture was treated with 1 M NaOH. After separation of the layers the organic phase was washed with brine and dried over MgSO<sub>4</sub>. Evaporation of the solvent gave *p*-methoxy-*N*-tosylaniline (1.13 g, 99%). <sup>1</sup>H-NMR (200 MHz, CDCl<sub>3</sub>): δ = 7.45 (*d*, *J* = 8.3, 2 H, CH); 7.22 (*d*, *J* = 8.5, 2 H, CH); 6.98-6.91 (*m*, 2 H, CH); 6.81-6.74 (*m*, 2 H, CH); 3.76 (*s*, 3 H, OCH<sub>3</sub>); 2.40 (*s*, 3 H, CH<sub>3</sub>). The tosylamide was used without further purification.

### **Synthesis of phosphonamides: General Procedure 1 (GP 1)**

According to Khan *et al.*<sup>[5]</sup> a soln. of NEt<sub>3</sub> and the aniline derivative in CH<sub>2</sub>Cl<sub>2</sub> was added to a soln. of **4** in CH<sub>2</sub>Cl<sub>2</sub> at 0 °C. After stirring for 16 h at 0 °C, the reaction mixture was treated with sat. aq. NH<sub>4</sub>Cl soln. and extracted with methyl(*t*-butyl)ether (MTBE). The organic layer was dried over MgSO<sub>4</sub>. Removal of the solvent *in vacuo* and purification by FC afforded the corresponding phosphonamides **5a-g**.

### **[(Methyl-phenyl-carbamoyl)-methyl]-phosphonic acid diethyl ester **5a****

According to GP 1 a soln. of NEt<sub>3</sub> (1.00 mL, 9.32 mmol) and *N*-methylaniline (1.28 mL, 9.32 mmol) in CH<sub>2</sub>Cl<sub>2</sub> (10 mL) were added to **4** (2.00 g, 9.32 mmol) in CH<sub>2</sub>Cl<sub>2</sub> (30 mL) at 0 °C. Purification by FC (pentane/MTBE 4:1 then acetone): **5a** (1.60 g, 60%). IR (film): 3474*br*, 2982*s*, 1656*s*, 1595*m*, 1497*m*, 1422*w*, 1375*m*, 1256*s*, 1026*s*, 966*m*, 777*m*, 516*br*. <sup>1</sup>H-NMR (300 MHz, CDCl<sub>3</sub>): δ = 7.45-7.26 (*m*, 5H, CH); 4.14 (*qd*, *J*<sub>1</sub> = *J*<sub>2</sub> = 7.1, 4 H, CH<sub>2</sub>); 3.29 (*s*, 3H, CH<sub>3</sub>); 2.82 (*d*, *J* = 21.7, 2 H, CH<sub>2</sub>); 1.31 (*t*, *J* = 7.1, 6 H, CH<sub>3</sub>). <sup>13</sup>C-NMR (75 MHz, CDCl<sub>3</sub>): 164.8 (*d*, *J*<sub>CP</sub> = 5.6, C), 143.8 (C), 129.7 (CH), 128.0 (CH), 127.4 (CH), 62.3 (*d*, *J*<sub>CP</sub>

= 6.2, OCH<sub>2</sub>), 37.5 (NCH<sub>3</sub>), 33.1 (*d*,  $J_{CP}$  = 138.0, CH<sub>2</sub>), 16.3 (*d*,  $J_{CP}$  = 6.7, CH<sub>3</sub>), 16.2 (CH<sub>3</sub>). MS (EI): 285 (20, [M]<sup>+</sup>), 137 (100, *N*-methylaniline). HRMS (EI) calcd for C<sub>13</sub>H<sub>20</sub>NO<sub>4</sub>P ([M]<sup>+</sup>): 285.1130. Found: 285.1132.

**{[(4-Methoxy-phenyl)-methyl-carbamoyl]-methyl}-phosphonic acid diethyl ester **5b****

According to GP 1 a soln. of NEt<sub>3</sub> (0.87 mL, 6.34 mmol) and *p*-methoxy-*N*-methylaniline (870 mg, 6.34 mmol) in CH<sub>2</sub>Cl<sub>2</sub> (10 mL) were added to **4** (1.36 g, 6.34 mmol) in CH<sub>2</sub>Cl<sub>2</sub> (25 mL) at 0 °C. Purification by FC (pentane/acetone 1:1): **5b** (1.47 g, 74%). IR (film): 3500*br*, 2982*s*, 1656*s*, 1513*s*, 1375*s*, 1300*s*, 1250*s*, 1109*m*, 1027*s*, 968*m*. <sup>1</sup>H-NMR (200 MHz, CDCl<sub>3</sub>): δ = 7.18 (*d*,  $J$  = 9.0, 2 H, CH); 6.90 (*d*,  $J$  = 9.0, 2 H, CH); 4.20-4.04 (*m*, 4 H, OCH<sub>2</sub>); 3.81 (*s*, 3 H, OCH<sub>3</sub>); 3.23 (*s*, 3 H, NCH<sub>3</sub>); 2.79 (*d*,  $J$  = 21.5, 2 H, CH<sub>2</sub>); 1.32-1.23 (*m*, 6 H, CH<sub>3</sub>). <sup>13</sup>C-NMR (50 MHz, CDCl<sub>3</sub>): 163.6 (*d*,  $J_{CP}$  = 5.3, C), 159.0 (C), 136.5 (C), 128.5 (CH), 114.8 (CH), 62.3 (*d*,  $J_{CP}$  = 6.1, CH<sub>2</sub>), 55.4 (CH<sub>3</sub>), 37.7 (CH<sub>3</sub>), 32.9 (*d*,  $J_{CP}$  = 137.0, CH<sub>2</sub>), 16.3 (*d*,  $J_{CP}$  = 6.6, CH<sub>3</sub>). MS (EI): 315 (17, [M]<sup>+</sup>), 137 (100, *p*-methoxy-*N*-methylaniline). HRMS (EI) calcd for C<sub>14</sub>H<sub>22</sub>NO<sub>5</sub>P ([M]<sup>+</sup>): 315.1236. Found: 315.1225.

**{[(3-Methoxy-phenyl)-methyl-carbamoyl]-methyl}-phosphonic acid diethyl ester **5c****

According to GP 1 a soln. of NEt<sub>3</sub> (0.80 mL, 5.83 mmol) and *m*-methoxy-*N*-methylaniline (800 mg, 5.83 mmol) in CH<sub>2</sub>Cl<sub>2</sub> (10 mL) were added to **4** (1.25 g, 5.83 mmol) in CH<sub>2</sub>Cl<sub>2</sub> (20 mL) at 0 °C. Purification by FC (pentane/acetone 1:1): **5c** (1.03 g, 56%). IR (film): 3477*br*, 2838*s*, 1659*s*, 1601*s*, 1490*s*, 1372*s*, 1254*s*, 1109*m*, 1028*s*, 966*m*. <sup>1</sup>H-NMR (300 MHz, CDCl<sub>3</sub>): δ = 7.32-7.28 (*m*, 1 H, CH); 6.91-6.85 (*m*, 3 H, CH); 4.15 (*q**d*,  $J_1 = J_2 = 7.3$ , 4 H, OCH<sub>2</sub>); 3.84 (*s*, 3 H, OCH<sub>3</sub>); 3.28 (*d*,  $J$  = 1.0, 3 H, NCH<sub>3</sub>); 2.84 (*d*,  $J$  = 21.7, 2 H, CH<sub>2</sub>); 1.32 (*t*,  $J$  = 7.1, 6 H, CH<sub>3</sub>). <sup>13</sup>C-NMR (75 MHz, CDCl<sub>3</sub>): 164.8 (C), 160.6 (C), 145.0 (C), 130.4 (CH), 119.4 (CH), 114.0 (CH), 113.2 (CH), 62.3 (*d*,  $J_{CP}$  = 6.2, CH<sub>2</sub>), 55.4 (CH<sub>3</sub>), 37.5 (CH<sub>3</sub>), 33.7 (*d*,  $J_{CP}$  = 137.0, CH<sub>2</sub>), 16.3 (*d*,  $J_{CP}$  = 6.7, CH<sub>3</sub>). MS (EI): 315 (20, [M]<sup>+</sup>), 137 (100, *m*-methoxy-*N*-methylaniline). HRMS (EI) calcd for C<sub>14</sub>H<sub>22</sub>NO<sub>5</sub>P ([M]<sup>+</sup>): 315.1236. Found: 315.1233.

**{[(2-Methoxy-phenyl)-methyl-carbamoyl]-methyl}-phosphonic acid diethyl ester **5d****

According to GP 1 a soln. of NEt<sub>3</sub> (0.33 mL, 2.33 mmol) and *o*-methoxy-*N*-methylaniline (320 mg, 2.33 mmol) in CH<sub>2</sub>Cl<sub>2</sub> (4 mL) were added to **4** (0.50 g, 2.33 mmol) in CH<sub>2</sub>Cl<sub>2</sub> (8

mL) at 0 °C. Purification by FC (pentane/acetone 1:1): **5d** (331 mg, 45%). IR (film): 3473*br*, 2841*s*, 1660*s*, 1597*m*, 1502*s*, 1375*s*, 1257*s*, 1102*m*, 1027*s*, 967*m*, 761*m*. <sup>1</sup>H-NMR (300 MHz, CDCl<sub>3</sub>): δ = 7.34-7.27 (*m*, 2 H, CH); 7.02-6.95 (*m*, 2 H, CH); 4.12 (*m*, 4 H, OCH<sub>2</sub>); 3.84 (*s*, 3 H, OCH<sub>3</sub>); 3.20 (*d*, *J* = 1.0, 3 H, NCH<sub>3</sub>); 2.82 (*dd*, *J*<sub>1</sub> = 15.2, *J*<sub>2</sub> = 20.3, 1 H, CH<sub>2</sub>); 2.72 (*dd*, *J*<sub>1</sub> = 15.2, *J*<sub>2</sub> = 20.3, 1 H, CH<sub>2</sub>); 1.30 (*dt*, *J*<sub>1</sub> = 7.1, *J*<sub>2</sub> = 9.3, 6 H, CH<sub>3</sub>). <sup>13</sup>C-NMR (75 MHz, CDCl<sub>3</sub>): 165.8 (C), 154.7 (C), 132.0 (C), 129.7 (CH), 129.4 (CH), 121.1 (CH), 111.8 (CH), 62.4 (*d*, *J*<sub>CP</sub> = 6.5, CH<sub>2</sub>), 62.1 (*d*, *J*<sub>CP</sub> = 6.1, CH<sub>2</sub>), 55.5 (CH<sub>3</sub>), 36.3 (CH<sub>3</sub>), 32.7 (*d*, *J*<sub>CP</sub> = 139.0, CH<sub>2</sub>), 16.3 (*d*, *J*<sub>CP</sub> = 6.6, CH<sub>3</sub>). MS (EI): 315 (17, [M]<sup>+</sup>), 137 (100, *o*-methoxy-*N*-methylaniline), 122 (63). HRMS (EI) calcd for C<sub>14</sub>H<sub>22</sub>NO<sub>5</sub>P ([M]<sup>+</sup>): 315.1236. Found: 315.1227.

**{2-[4-Methoxy-phenyl-(toluene-4-sulfonyl)-amino]-2-oxo-ethyl}-phosphonic acid diethyl ester **5e****

According to GP 1 a soln. of NEt<sub>3</sub> (0.64 mL, 4.66 mmol) and *p*-methoxy-*N*-tosylanilide (1.20 g, 4.00 mmol) in CH<sub>2</sub>Cl<sub>2</sub> (5 mL) were added to **4** (1.00 g, 4.66 mmol) in CH<sub>2</sub>Cl<sub>2</sub> (15 mL) at 0 °C. Purification by FC (pentane/acetone 1:1): **5e** (741 mg, 41%). IR (film): 2983*w*, 1703*s*, 1602*m*, 1507*s*, 1361*s*, 1252*s*, 1171*s*, 1025*s*, 972*m*, 641*m*, 564*s*, 547*s*. <sup>1</sup>H-NMR (300 MHz, CDCl<sub>3</sub>): δ = 7.92 (*d*, *J* = 8.6, 2 H, CH); 7.33 (*d*, *J* = 8.0, 2 H, CH); 7.25 (*d*, *J* = 8.8, 2 H, CH); 6.97 (*d*, *J* = 6.8, 2 H, CH); 4.08-3.98 (*m*, 4 H, OCH<sub>2</sub>); 3.86 (*s*, 3 H, OCH<sub>3</sub>); 2.80 (*d*, *J* = 21.7, 2 H, CH<sub>2</sub>); 2.45 (*s*, 3 H, CH<sub>3</sub>); 1.25 (*t*, *J* = 7.1, 6 H, OCH<sub>2</sub>CH<sub>3</sub>). <sup>13</sup>C-NMR (75 MHz, CDCl<sub>3</sub>): 165.1 (C), 160.8 (C), 144.9 (C), 135.7 (C), 131.4 (CH), 129.3 (CH), 128.5 (C), 115.0 (CH), 62.8 (*d*, *J*<sub>CP</sub> = 6.7, CH<sub>2</sub>), 55.5 (OCH<sub>3</sub>), 35.5 (*d*, *J*<sub>CP</sub> = 134.0, CH<sub>2</sub>), 21.6 (CH<sub>3</sub>), 16.3 (*d*, *J*<sub>CP</sub> = 9.9, CH<sub>3</sub>). MS (ESI): 478 (100, [M+Na]<sup>+</sup>), 398 (20), 323 (24). HRMS (ESI) calcd for C<sub>20</sub>H<sub>26</sub>NNaO<sub>7</sub>PS ([M+Na]<sup>+</sup>): 478.1066. Found: 478.1066.

**[(Benzyl-phenyl-carbamoyl)-methyl]-phosphonic acid diethyl ester **5f****

According to GP 1 a soln. of NEt<sub>3</sub> (0.75 mL, 5.46 mmol) and *N*-phenylbenzylamine (1.00 g, 5.46 mmol) in CH<sub>2</sub>Cl<sub>2</sub> (5 mL) were added to **4** (1.17 g, 5.46 mmol) in CH<sub>2</sub>Cl<sub>2</sub> (20 mL) at 0 °C. Purification by FC (pentane/acetone 1:1): **5f** (828 mg, 42%) was obtained as a brown oil. IR (film): 3475*s*, 3031*m*, 1657*s*, 1595*s*, 1496*s*, 1410*m*, 1389*m*, 1256*s*, 1027*s*, 967*s*, 778*m*, 701*s*. <sup>1</sup>H-NMR (200 MHz, CDCl<sub>3</sub>): δ = 7.32-7.05 (*m*, 10 H, CH); 4.92 (*s*, 2 H, NCH<sub>2</sub>); 4.15 (*qd*, *J*<sub>1</sub> = *J*<sub>2</sub> = 7.2, 4 H, OCH<sub>2</sub>); 2.84 (*d*, *J* = 21.9, 2 H, CH<sub>2</sub>); 1.31 (*t*, *J* = 7.2, 6 H, CH<sub>3</sub>). <sup>13</sup>C-

NMR (75 MHz, CDCl<sub>3</sub>): 164.9 (*d*,  $J_{\text{CP}} = 5.6$ , C), 142.1 (C), 137.0 (C), 129.6 (CH), 128.7 (CH), 128.6 (CH), 128.3 (CH), 128.3 (CH), 127.4 (CH), 62.4 (*d*,  $J_{\text{CP}} = 6.2$ , CH<sub>2</sub>), 53.2 (CH<sub>2</sub>), 33.5 (*d*,  $J_{\text{CP}} = 136.0$ , CH<sub>2</sub>), 16.3 (*d*,  $J_{\text{CP}} = 6.2$ , CH<sub>3</sub>). MS (EI): 361 (4, [M]<sup>+</sup>), 182 (100, *N*-phenylbenzylamine), 91 (31). HRMS (EI) calcd for C<sub>19</sub>H<sub>24</sub>NO<sub>4</sub>P ([M]<sup>+</sup>): 361.1443. Found: 301.1440.

### **[(4-Methoxy-phenylcarbamoyl)-methyl]-phosphonic acid diethyl ester 5g**

According to GP 1 a soln. of NEt<sub>3</sub> (1.28 mL, 9.32 mmol) and *p*-methoxy-*N*-methylaniline (1.14 g, 9.32 mmol) in CH<sub>2</sub>Cl<sub>2</sub> (10 mL) were added to **4** (2.00 g, 9.32 mmol) in CH<sub>2</sub>Cl<sub>2</sub> (40 mL) at 0 °C. Purification by FC (pentane/acetone 1:1): **5g** (1.87 g, 66%). M.p. 79 °C. IR (KBr): 3273*m*, 2987*m*, 1688*s*, 1607*m*, 1554*m*, 1513*s*, 1250*s*, 1226*s*, 1029*s*, 953*m*, 880*m*. <sup>1</sup>H-NMR (300 MHz, CDCl<sub>3</sub>): δ = 8.70 (*s*, 1 H, NH); 7.43 (*d*,  $J = 9.0$ , 2 H, CH); 6.84 (*d*,  $J = 9.0$ , 2 H, CH); 4.23-4.13 (*m*, 4 H, OCH<sub>2</sub>); 3.79 (*s*, 3 H, OCH<sub>3</sub>); 2.99 (*d*,  $J = 20.5$ , 2 H, CH<sub>2</sub>); 1.36 (*t*,  $J = 7.1$ , 6 H, CH<sub>3</sub>). <sup>13</sup>C-NMR (75 MHz, CDCl<sub>3</sub>): 161.9 (C), 156.3 (C), 131.1 (C), 121.5 (CH), 114.0 (CH), 63.0 (*d*,  $J_{\text{CP}} = 6.7$ , CH<sub>2</sub>), 55.4 (OCH<sub>3</sub>), 36.0 (*d*,  $J_{\text{CP}} = 129.0$ , CH<sub>2</sub>), 16.3 (*d*,  $J_{\text{CP}} = 6.2$ , CH<sub>3</sub>). MS (EI): 301 (32, [M]<sup>+</sup>), 123 (100). HRMS (EI) calcd for C<sub>13</sub>H<sub>20</sub>NO<sub>5</sub>P ([M]<sup>+</sup>): 301.1079. Found: 301.1079.

### **Synthesis of alkoxyamines: General Procedure 2 (GP 2)**

A soln. of diisopropylamine (DIPA) in 1,2-dimethoxyethane (DME) was treated with BuLi at –60 °C. After stirring for 20 min. at –60 °C the phosphonamide was added and stirring was continued for 30 min. at –60 °C. 2,2,6,6-Tetramethylpiperidin-1-oxyl radical (TEMPO) and subsequently anhydrous CuCl<sub>2</sub> were added. The resulting mixture was stirred for 1 h at –60 °C and was then allowed to warm to 0 °C and was stirred for another 3 h at this temperature. The reaction mixture was treated with sat. aq. NH<sub>4</sub>Cl soln. and extracted with MTBE (three times). The organic layers were combined and dried over MgSO<sub>4</sub>. Evaporation of the solvent *in vacuo* and purification of by FC afforded the alkoxyamines **6a-g**.

### **[(Methyl-phenyl-carbamoyl)-(2,2,6,6-tetramethyl-piperidin-1-yloxy)-methyl]-phosphonic acid diethyl ester 6a**

According to GP 2 TEMPO (358 mg, 2.29 mmol) and CuCl<sub>2</sub> (1.67 g, 12.48 mmol) were added to a soln. of DIPA (0.32 mL, 2.29 mmol), BuLi (1.21 mL, 1.89 M in hexane, 2.29

mmol) and **5a** (594 mg, 2.08 mmol) in DME (20 mL). After purification by FC (EtOAc) **6a** (685 mg, 75%) was obtained as yellow crystals. M.p. 98 – 104 °C. IR (KBr): 2972<sub>s</sub>, 2935<sub>s</sub>, 1662<sub>s</sub>, 1595<sub>w</sub>, 1496<sub>m</sub>, 1390<sub>m</sub>, 1252<sub>s</sub>, 1033<sub>s</sub>, 972<sub>m</sub>, 540<sub>m</sub>. <sup>1</sup>H-NMR (200 MHz, CDCl<sub>3</sub>): δ = 7.42-7.32 (*m*, 5 H, CH); 4.94 (*d*, *J* = 17.7, 1 H, PCH); 4.31-4.15 (*m*, 4 H, OCH<sub>2</sub>); 3.30 (*s*, 3 H, NCH<sub>3</sub>); 1.47-1.09 (*m*, 24 H, CH<sub>3</sub>, CH<sub>2</sub>). <sup>13</sup>C-NMR (75 MHz, CDCl<sub>3</sub>): 130.1 (C), 129.4 (CH), 128.2 (CH), 127.8 (C), 63.0 (*d*, *J*<sub>CP</sub> = 55.0, CH), 61.3 (CH<sub>2</sub>), 59.5 (C), 40.7 (CH<sub>2</sub>), 37.7 (CH<sub>3</sub>), 33.12 (CH<sub>3</sub>), 31.6 (CH<sub>3</sub>), 20.2 (CH<sub>3</sub>), 20.0 (CH<sub>3</sub>), 17.0 (CH<sub>2</sub>). MS (ESI): 463 (55, [M+Na]<sup>+</sup>), 307 (100). HRMS (ESI) calcd for C<sub>22</sub>H<sub>37</sub>N<sub>2</sub>NaO<sub>6</sub>P ([M+Na]<sup>+</sup>): 463.2338. Found: 463.2344.

**{[(4-Methoxy-phenyl)-methyl-carbamoyl]-(2,2,6,6-tetramethyl-piperidin-1-yloxy)-methyl}-phosphonic acid diethyl ester **6b****

According to GP 2 TEMPO (791 mg, 5.06 mmol) and CuCl<sub>2</sub> (3.71 g, 27.60 mmol) were added to a soln. of DIPA (0.71 mL, 5.06 mmol), BuLi (2.67 mL, 1.89 M in hexane, 5.06 mmol) and **5b** (1.45 g, 4.60 mmol) in DME (30 mL). After purification by FC (EtOAc) **6b** (1.72 mg, 81%) was obtained as a brown oil. IR (film): 3479<sub>br</sub>, 2975<sub>s</sub>, 2932<sub>s</sub>, 1665<sub>s</sub>, 1512<sub>s</sub>, 1466<sub>w</sub>, 1380<sub>m</sub>, 1249<sub>s</sub>, 1013<sub>s</sub>, 974<sub>m</sub>, 540<sub>m</sub>. <sup>1</sup>H-NMR (200 MHz, CDCl<sub>3</sub>): δ = 7.28 (*d*, *J* = 9.0, 2 H, CH); 6.91 (*d*, *J* = 9.0, 2 H, CH); 4.95 (*d*, *J* = 18.0, 1 H, PCH); 4.27-4.10 (*m*, 4 H, OCH<sub>2</sub>); 3.83 (*s*, 3 H, OCH<sub>3</sub>); 3.26 (*s*, 3 H, NCH<sub>3</sub>); 1.47-1.10 (*m*, 24 H, CH<sub>3</sub>, CH<sub>2</sub>). <sup>13</sup>C-NMR (50 MHz, CDCl<sub>3</sub>): 167.5 (C), 158.9 (C), 136.2 (C), 129.2 (CH), 114.4 (CH), 78.5 (*d*, *J*<sub>CP</sub> = 155.0, CH), 63.4 (*d*, *J*<sub>CP</sub> = 9.2, CH<sub>2</sub>), 62.6 (C), 62.5 (C), 55.5 (CH<sub>3</sub>), 40.9 (CH<sub>2</sub>), 40.6 (CH<sub>2</sub>), 38.0 (CH<sub>3</sub>), 33.1 (CH<sub>3</sub>), 31.6 (CH<sub>3</sub>), 20.1 (CH<sub>3</sub>), 20.1 (CH<sub>3</sub>), 16.9 (CH<sub>2</sub>). MS (ESI): 493 (30, [M+Na]<sup>+</sup>), 337 (100), 280 (85), 233 (38), 201 (85). HRMS (ESI) calcd for C<sub>23</sub>H<sub>39</sub>N<sub>2</sub>NaO<sub>6</sub>P ([M+Na]<sup>+</sup>): 493.2443. Found: 493.2436.

**{[(3-Methoxy-phenyl)-methyl-carbamoyl]-(2,2,6,6-tetramethyl-piperidin-1-yloxy)-methyl}-phosphonic acid diethyl ester **6c****

According to GP 2 TEMPO (436 mg, 2.79 mmol) and CuCl<sub>2</sub> (2.05 g, 15.24 mmol) were added to a soln. of DIPA (0.40 mL, 2.79 mmol), BuLi (1.47 mL, 1.89 M in hexane, 2.79 mmol) and **5c** (800 mg, 2.54 mmol) in DME (18 mL). After purification by FC (EtOAc/pentane 4:1) **6c** (1.06 g, 89%) was obtained as a red oil. IR (film): 3480<sub>br</sub>, 2976<sub>s</sub>, 2932<sub>s</sub>, 1669<sub>s</sub>, 1601<sub>s</sub>, 1489<sub>m</sub>, 1380<sub>m</sub>, 1257<sub>s</sub>, 1030<sub>s</sub>, 975<sub>m</sub>. <sup>1</sup>H-NMR (300 MHz, CDCl<sub>3</sub>): δ = 7.33-7.28 (*m*, 1 H, CH); 6.97-6.85 (*m*, 3 H, CH); 4.99 (*d*, *J* = 18.1, 1 H, PCH); 4.37-4.11 (*m*, 4 H, OCH<sub>2</sub>); 3.84 (*s*, 3 H, OCH<sub>3</sub>); 3.29 (*d*, *J* = 1.0, 3 H, NCH<sub>3</sub>); 1.53- 1.10 (*m*, 24 H, CH<sub>3</sub>, CH<sub>2</sub>).

$^{13}\text{C}$ -NMR (75 MHz,  $\text{CDCl}_3$ ): 167.3 (C), 160.3 (C), 144.6 (C), 130.0 (CH), 120.2 (CH), 113.9 (CH), 113.8 (CH), 78.0 (*d*,  $J_{\text{CP}} = 152.0$ , CH), 63.3 (*d*,  $J_{\text{CP}} = 6.2$ ,  $\text{CH}_2$ ), 63.0 (*d*,  $J_{\text{CP}} = 6.2$ ,  $\text{CH}_2$ ), 61.4 (C), 59.5 (C), 55.5 ( $\text{CH}_3$ ), 41.0 ( $\text{CH}_2$ ), 40.7 ( $\text{CH}_2$ ), 37.5 ( $\text{CH}_3$ ), 33.3 ( $\text{CH}_3$ ), 31.7 ( $\text{CH}_3$ ), 20.2 ( $\text{CH}_3$ ), 19.7 ( $\text{CH}_3$ ), 17.0 ( $\text{CH}_2$ ), 16.4 (*d*,  $J_{\text{CP}} = 8.4$ ,  $\text{CH}_3$ ). MS (ESI): 493 (85,  $[\text{M}+\text{Na}]^+$ ), 337 (100), 156 (35). HRMS (ESI) calcd for  $\text{C}_{23}\text{H}_{39}\text{N}_2\text{NaO}_6\text{P}$  ( $[\text{M}+\text{Na}]^+$ ): 493.2443. Found: 493.2445.

**[[2-(4-Methoxy-phenyl)-methyl-carbamoyl]-(2,2,6,6-tetramethyl-piperidin-1-yloxy)-methyl]-phosphonic acid diethyl ester 6d**

According to GP 2 TEMPO (158 mg, 1.01 mmol) and  $\text{CuCl}_2$  (750 mg, 5.52 mmol) were added to a soln. of DIPA (0.15 mL, 1.01 mmol), BuLi (0.53 mL, 1.89 M in hexane, 1.01 mmol) and **5d** (290 mg, 0.92 mmol) in DME (10 mL). After purification by FC (EtOAc/pentane 4:1) **6d** (302 mg, 70%, *isomer ratio* 1:1.7) was obtained as a mixture of isomers. *Both isomers*: IR (film): 2979s, 2940s, 1667s, 1502s, 1382m, 1254s, 1047m, 1026s, 969m, 704s.  $^1\text{H}$ -NMR (200 MHz,  $\text{CDCl}_3$ ):  $\delta = 7.35\text{--}7.28$  (*m*, 2 H, CH); 7.02–6.91 (*m*, 2 H, CH); 4.92, 4.82 (*d*,  $J = 20.8$ , 1 H, PCH); 4.28–4.15 (*m*, 4 H,  $\text{OCH}_2$ ); 3.88, 3.85 (2 s, 3 H,  $\text{OCH}_3$ ); 3.21 (2 s, 3 H,  $\text{NCH}_3$ ); 1.43–1.06 (*m*, 24 H,  $\text{CH}_3$ ,  $\text{CH}_2$ ).  $^{13}\text{C}$ -NMR (75 MHz,  $\text{CDCl}_3$ ): 155.3 (C), 130.7 (CH), 130.3 (CH), 129.4 (CH), 129.2 (CH), 120.7 (CH), 120.3 (CH), 111.7 (CH), 111.4 (CH), 79.0 (CH), 78.6 (CH), 63.6 (*d*,  $J_{\text{CP}} = 6.7$ ,  $\text{CH}_2$ ), 62.4 (*d*,  $J_{\text{CP}} = 6.7$ ,  $\text{CH}_2$ ), 61.6 (C), 61.1 (C), 55.3 ( $\text{CH}_3$ ), 40.8 ( $\text{CH}_2$ ), 40.6 ( $\text{CH}_2$ ), 36.6 ( $\text{CH}_3$ ), 35.9 ( $\text{CH}_3$ ), 32.8 ( $\text{CH}_3$ ), 32.6 ( $\text{CH}_3$ ), 32.2 ( $\text{CH}_3$ ), 31.3 ( $\text{CH}_3$ ), 20.4 ( $\text{CH}_3$ ), 20.2 ( $\text{CH}_3$ ), 19.7 ( $\text{CH}_3$ ), 17.0 ( $\text{CH}_2$ ), 16.4 ( $\text{CH}_3$ ), 16.3 ( $\text{CH}_3$ ). MS (EI): 470 (6,  $[\text{M}]^+$ ), 314 (6), 156 (100), 69 (27). HRMS (EI) calcd for  $\text{C}_{23}\text{H}_{39}\text{N}_2\text{O}_6\text{P}$  ( $[\text{M}]^+$ ): 470.2546. Found: 470.2545.

**[2-(4-Methoxy-phenyl)-(toluene-4-sulfonyl)-amino]-2-oxo-1-(2,2,6,6-tetramethyl-piperidin-1-yloxy)-ethyl]-phosphonic acid diethyl ester 6e**

According to GP 2 TEMPO (257 mg, 1.64 mmol) and  $\text{CuCl}_2$  (1.60 g, 11.95 mmol) were added to a soln. of DIPA (0.24 mL, 1.64 mmol), BuLi (0.87 mL, 1.89 M in hexane, 1.64 mmol) and **5e** (680 mg, 1.50 mmol) in DME (25 mL). After purification by FC (1. FC EtOAc, 2. FC pentane/acetone 2:1) **6e** (694 mg, 76%) was obtained as a yellow oil. IR (film): 2934w, 1711s, 1604w, 1508s, 1365s, 1250s, 1173s, 1054s, 1025s, 667m, 568s, 550m.  $^1\text{H}$ -NMR (200 MHz,  $\text{CDCl}_3$ ):  $\delta = 7.97$  (*d*,  $J = 8.3$ , 2 H, CH); 7.31 (*d*,  $J = 8.3$ , 4 H, CH); 6.97 (*d*,  $J = 9.0$ , 2 H, CH); 4.82 (*d*,  $J = 20.0$ , 1 H, PCH); 4.25–4.02 (*m*, 4 H,  $\text{OCH}_2$ ); 3.86 (s, 3 H,  $\text{OCH}_3$ ); 2.44 (s, 3



H, CH<sub>3</sub>); 1.35-0.76 (*m*, 24 H, CH<sub>3</sub>, CH<sub>2</sub>). <sup>13</sup>C-NMR (75 MHz, CDCl<sub>3</sub>): 168.0 (C), 160.6 (C), 144.6 (C), 136.0 (C), 132.1 (CH), 129.5 (CH), 129.1 (CH), 128.2 (C), 114.7 (CH), 81.3 (*d*, *J*<sub>CP</sub> = 150.5, CH), 63.7 (CH<sub>2</sub>), 63.3 (OCH<sub>2</sub>), 61.6 (C), 55.6 (CH<sub>3</sub>), 40.9 (CH<sub>2</sub>), 40.7 (CH<sub>2</sub>), 33.7 (CH<sub>3</sub>), 31.7 (CH<sub>3</sub>), 21.6 (CH<sub>3</sub>), 20.1 (CH<sub>3</sub>), 16.9 (CH<sub>2</sub>), 16.3 (CH<sub>2</sub>). MS (ESI): 633 (15, [M+Na]<sup>+</sup>), 477 (25), 331 (50), 299 (100). HRMS (ESI) calcd for C<sub>29</sub>H<sub>43</sub>N<sub>2</sub>NaO<sub>8</sub>PS ([M+Na]<sup>+</sup>): 633.2375. Found: 633.2382.

**[(Benzyl-phenyl-carbamoyl)-(2,2,6,6-tetramethyl-piperidin-1-yloxy)-methyl]-phosphonic acid diethyl ester **6f****

According to GP 2 TEMPO (380 mg, 2.22 mmol) and CuCl<sub>2</sub> (1.81 g, 13.29 mmol) were added to a soln. of DIPA (0.36 mL, 2.44 mmol), BuLi (1.28 mL, 1.89 M in hexane, 2.44 mmol) and **5f** (800 mg, 2.22 mmol) in DME (24 mL). After purification by FC (EtOAc/pentane 4:1) **6f** (1.05 g, 92%) was obtained as a yellow oil. IR (film): 2976*s*, 2931*s*, 1667*s*, 1496*s*, 1396*m*, 1256*s*, 1026*s*, 973*m*, 700*s*, 536*m*. <sup>1</sup>H-NMR (300 MHz, CDCl<sub>3</sub>): δ = 7.34-7.15 (*m*, 10 H, CH); 5.03 (*d*, *J* = 14.3, 1 H, NCH<sub>2</sub>); 4.89 (*d*, *J* = 18.2, 1 H, PCH); 4.81 (*d*, *J* = 13.9, 1 H, NCH<sub>2</sub>); 4.39-4.12 (*m*, 4 H, OCH<sub>2</sub>); 1.45-1.10 (*m*, 24 H, CH<sub>3</sub>, CH<sub>2</sub>). <sup>13</sup>C-NMR (75 MHz, CDCl<sub>3</sub>): 167.1 (C), 141.5 (C), 136.6 (C), 129.3 (CH), 129.1 (CH), 129.0 (CH), 128.0 (CH), 127.9 (CH), 127.2 (CH), 78.4 (CH), 63.0 (*d*, *J*<sub>CP</sub> = 6.2, CH<sub>2</sub>), 62.7 (*d*, *J*<sub>CP</sub> = 5.6, CH<sub>2</sub>), 61.2 (C), 59.3 (C), 53.3 (CH<sub>2</sub>), 40.8 (CH<sub>2</sub>), 40.6 (CH<sub>2</sub>), 33.5 (CH<sub>3</sub>), 31.5 (CH<sub>3</sub>), 20.1 (CH<sub>3</sub>), 19.8 (CH<sub>3</sub>), 16.9 (CH<sub>2</sub>), 16.3 (CH<sub>3</sub>), 16.3 (CH<sub>3</sub>). MS (ESI): 743 (60), 560 (20), 539 (100, [M+Na]<sup>+</sup>), 383 (80), 156 (50). HRMS (ESI) calcd for C<sub>28</sub>H<sub>41</sub>N<sub>2</sub>NaO<sub>5</sub>P ([M+Na]<sup>+</sup>): 539.2651. Found: 539.2654.

**[(4-Methoxy-phenylcarbamoyl)-(2,2,6,6-tetramethyl-piperidin-1-yloxy)-methyl]-phosphonic acid diethyl ester **6g****

According to GP 2 TEMPO (284 mg, 1.82 mmol) and CuCl<sub>2</sub> (1.78 g, 13.28 mmol) were added to a soln. of DIPA (0.50 mL, 3.49 mmol), BuLi (2.14 mL, 1.63 M in hexane, 3.49 mmol) and **5g** (500 mg, 1.66 mmol) in DME (15 mL). After purification by FC (EtOAc) **6g** (403 mg, 53%) was obtained as yellow crystals. M.p. 115–119 °C. IR (KBr): 3259*m*, 2983*m*, 2937*m*, 1680*s*, 1551*m*, 1511*s*, 1234*m*, 1063*s*, 1037*s*, 834*m*, 549*m*. <sup>1</sup>H-NMR (200 MHz, CDCl<sub>3</sub>): δ = 8.21 (*s*, 1 H, NH); 7.44 (*d*, *J* = 7.0, 2 H, CH); 6.84 (*d*, *J* = 7.0, 2 H, CH); 4.74 (*d*, *J* = 17.0, 1 H, PCH); 4.32-4.13 (*m*, 4 H, OCH<sub>2</sub>); 3.79 (*s*, 3 H, OCH<sub>3</sub>); 1.47-1.18 (*m*, 24 H, CH<sub>3</sub>, CH<sub>2</sub>). <sup>13</sup>C-NMR (75 MHz, CDCl<sub>3</sub>): 165.3 (C), 156.5 (C), 130.5 (C), 121.2 (CH), 114.2

(CH), 85.2 (*d*,  $J_{\text{CP}} = 146.0$ , CH) 63.4 (*d*,  $J_{\text{CP}} = 6.7$ , CH<sub>2</sub>), 63.2 (*d*,  $J_{\text{CP}} = 7.3$ , CH<sub>2</sub>), 55.4 (CH<sub>3</sub>), 40.8 (CH<sub>2</sub>), 16.9 (CH<sub>2</sub>), 16.4 (CH<sub>3</sub>). MS (ESI): 479 (100, [M+Na]<sup>+</sup>), 323 (75). HRMS (ESI) calcd for C<sub>22</sub>H<sub>37</sub>N<sub>2</sub>NaO<sub>6</sub>P ([M+Na]<sup>+</sup>): 479.2287. Found: 479.2282

### (1-Methyl-2-oxo-2,3-dihydro-1*H*-indol-3-yl)-phosphonic acid diethyl ester **7**

Phosphonate **6a** (56 mg, 0.13 mmol) was dissolved under Ar in DMF (5 mL). In a sealed tube the soln. was heated to 180 °C for 2 min using microwave irradiation. Evaporation of the solvent and purification by FC (EtOAc) afforded **7** (29 mg, 81%) as an oil. IR (film): 3500*br*, 2980*s*, 1717*s*, 1559*s*, 1539*s*, 1473*s*, 1377*s*, 1185*m*, 1021*s*, 960*m*. <sup>1</sup>H-NMR (200 MHz, CDCl<sub>3</sub>): δ = 7.48-7.33 (*m*, 4 H, CH); 4.44 (*d*,  $J = 13.6$ , 2 H, PCH); 4.41-4.26 (*m*, 2 H, OCH<sub>2</sub>); 4.24-4.11 (*m*, 2 H, OCH<sub>2</sub>); 3.33 (*s*, 3 H, NCH<sub>3</sub>); 1.38 (*td*,  $J_1 = 6.8$ ,  $J_2 = 0.8$ , 3 H, CH<sub>3</sub>); 1.29 (*t*,  $J = 6.8$ , 3 H, CH<sub>3</sub>). <sup>13</sup>C-NMR (75 MHz, CDCl<sub>3</sub>): 167.8 (C), 159.1 (C), 136.4 (C), 129.4 (CH), 114.6 (CH), 62.8 (CH<sub>2</sub>), 62.7 (CH<sub>2</sub>), 55.7 (CH), 33.4 (CH<sub>3</sub>), 20.3 (CH<sub>3</sub>), 20.1 (CH<sub>3</sub>). MS (EI): 283 (87, [M]<sup>+</sup>), 255 (38), 227 (79), 157 (TEMPOH). HRMS (EI) calcd for C<sub>13</sub>H<sub>18</sub>NO<sub>4</sub>P ([M]<sup>+</sup>): 283.0973. Found: 283.0960.

### Homolytic Aromatic Substitution with Subsequent *Horner-Wadsworth-Emmons-Olefination*: General Procedure 3 (GP 3)

The alkoxyamine was dissolved under Ar in DMF (5 mL). In a sealed tube the soln. was heated to 180 °C for 2 min using microwave irradiation. The reaction mixture was then allowed to cool to room temperature and KO<sup>t</sup>-Bu and the aldehyde (10-20 equiv) were added. The reaction mixture was then heated to 180 °C for 6 min using microwave irradiation. The reaction mixture was treated with sat. Na<sub>2</sub>SO<sub>3</sub> soln. and the aqueous layer was extracted with CH<sub>2</sub>Cl<sub>2</sub> (three times). The organic layer was dried over MgSO<sub>4</sub>. Removal of the solvent *in vacuo* and FC afforded the 2-oxindole derivatives.

### 3-Benzylidene-1-methyl-1,3-dihydro-indol-2-one **8a**

According to GP 3 with **6a** (217 mg, 0.49 mmol) in DMF (5 mL) and KO<sup>t</sup>-Bu (66 mg, 0.59 mmol) and benzaldehyde (0.53 g, 4.9 mmol). After purification by FC (pentane/MTBE 4:1) **8a** (87 mg, 75%) was obtained as a mixture of isomers (*cis:trans* = 1:3.4) which were separated. *cis*-Isomer: M.p. 106 °C. IR (KBr): 1688*s*, 1618*w*, 1604*m*, 1491*m*, 1469*s*, 1389*m*, 1090*s*, 1040*m*, 752*s*, 708*m*. <sup>1</sup>H-NMR (300 MHz, CDCl<sub>3</sub>): δ = 8.29 (*d*,  $J = 7.8$ , 2 H, CH); 7.51

(*s*, 1 H, CH=C); 7.49 (*d*, 1 H, CH); 7.46-7.31 (*m*, 3 H, CH); 7.26 (*dd*,  $J_1 = J_2 = 7.6$ , 1.0, 1 H, CH); 7.05 (*dd*,  $J_1 = J_2 = 7.6$ , 1 H, CH); 6.80 (*d*,  $J = 7.8$ , 1 H, CH); 3.26 (*s*, 3 H, CH<sub>3</sub>). <sup>13</sup>C-NMR (75 MHz, CDCl<sub>3</sub>): 165.1 (C), 141.4 (C), 136.0 (CH), 132.8 (C), 130.9 (CH), 129.4 (CH), 128.3 (CH), 127.2 (CH), 125.1 (C), 123.4 (C), 120.8 (CH), 118.0 (CH), 106.9 (CH), 24.9 (CH<sub>3</sub>). MS (EI): 235 (100, [M]<sup>+</sup>). HRMS (EI) calcd for C<sub>16</sub>H<sub>13</sub>NO ([M]<sup>+</sup>): 235.0997. Found: 235.0998.

*trans*-Isomer: <sup>1</sup>H-NMR (300 MHz, CDCl<sub>3</sub>):  $\delta$  = 7.85 (*s*, 1 H, CH=C); 7.66-7.46 (*m*, 3 H, CH); 7.43-7.24 (*m*, 4 H, CH); 6.90-6.81 (*m*, 2 H, CH); 3.28 (*s*, 3 H, CH<sub>3</sub>). <sup>13</sup>C-NMR (75 MHz, CDCl<sub>3</sub>): 168.2 (C), 144.0 (C), 136.9 (CH), 134.8 (C), 129.5 (CH), 129.2 (CH), 129.0 (CH), 128.4 (CH), 127.0 (C), 122.5 (CH), 121.5 (CH), 120.9 (C), 107.9 (CH), 25.9 (CH<sub>3</sub>).

### 1-Methyl-3-(4-trifluoromethyl-benzylidene)-1,3-dihydro-indol-2-one **8b**

According to GP 3 with **6a** (189 mg, 0.43 mmol) in DMF (5 mL) and KO<sup>t</sup>-Bu (58 mg, 0.52 mmol) and  $\alpha,\alpha,\alpha$ -trifluorotolylaldehyde (0.75 g, 4.3 mmol). After purification by FC (pentane/MTBE 4:1) **8b** (113 mg, 87%) was obtained as a mixture of isomers (*cis:trans* = 1:1.9) which were separated. *cis*-Isomer: M.p. 131 °C. IR (KBr): 3452<sub>br</sub>, 2963<sub>w</sub>, 1687<sub>s</sub>, 1322<sub>s</sub>, 1176<sub>m</sub>, 1109<sub>s</sub>, 1067<sub>m</sub>, 1040<sub>m</sub>, 1018<sub>m</sub>. <sup>1</sup>H-NMR (200 MHz, CDCl<sub>3</sub>):  $\delta$  = 8.32 (*d*,  $J = 8.3$ , 2 H, CH); 7.68 (*d*,  $J = 7.0$ , 2 H, CH); 7.54 (*d*,  $J = 7.0$ , 1 H, CH); 7.53 (*s*, 1 H, CH=C); 7.30 (*dd*,  $J_1 = J_2 = 7.5$ , 1 H, CH); 7.09 (*dd*,  $J_1 = J_2 = 7.5$ , 1 H, CH); 6.84 (*d*,  $J = 7.7$ , 1 H, CH); 3.27 (*s*, 3 H, CH<sub>3</sub>). <sup>13</sup>C-NMR (75 MHz, CDCl<sub>3</sub>): 165.8 (C), 142.8 (C), 137.0 (C), 134.4 (CH), 131.7 (CH), 131.1 (C), 130.7 (CH), 128.3 (C), 125.0 (CH), 123.7 (C), 122.0 (CH), 119.3 (CH), 108.1 (CH), 26.0 (CH<sub>3</sub>). MS (EI): 303 (100, [M]<sup>+</sup>). HRMS (EI) calcd for C<sub>17</sub>H<sub>12</sub>F<sub>3</sub>NO ([M]<sup>+</sup>): 303.0871. Found: 303.0875.

*trans*-Isomer: <sup>1</sup>H-NMR (200 MHz, CDCl<sub>3</sub>):  $\delta$  = 7.82 (*s*, 1 H, CH=C); 7.74 (*br s*, 3 H, CH); 7.42 (*d*,  $J = 7.5$ , 1 H, CH); 7.33 (*dd*,  $J_1 = 6.74$ ,  $J_2 = 1.0$ , 2 H, CH); 6.94-6.83 (*m*, 2 H, CH); 3.30 (*s*, 3 H, CH<sub>3</sub>). <sup>13</sup>C-NMR (75 MHz, CDCl<sub>3</sub>): 167.9 (C), 144.6 (C), 138.7 (C), 134.6 (CH), 130.5 (C), 130.4 (CH), 129.3 (CH), 128.9 (C), 125.6 (CH), 122.8 (CH), 121.9 (CH), 120.6 (C), 108.4 (CH), 24.9 (CH<sub>3</sub>).

### 1-Methyl-3-(4-nitro-benzylidene)-1,3-dihydro-indol-2-one **8c**

According to GP 3 with **6a** (78 mg, 0.18 mmol) in DMF (5 mL) and KO<sup>t</sup>-Bu (24 mg, 0.21 mmol) and 4-nitrobenzaldehyde (0.27 g, 1.8 mmol). After purification by FC (pentane/MTBE 4:1) **8c** (22 mg, 44%) was obtained as a mixture of isomers (*cis:trans* = 1:1.4) which were separated. *cis*-Isomer: M.p. 189 °C. IR (KBr): 2963w, 1677s, 1605m, 1588m, 1517m, 1469m, 1337s, 1263m, 1090m, 906m, 816w, 744m. <sup>1</sup>H-NMR (200 MHz, CDCl<sub>3</sub>): δ = 8.37 (*d*, *J* = 13.5, 2 H, CH); 8.25 (*d*, *J* = 13.5, 2 H, CH); 7.55 (*d*, *J* = 13.5, 1 H, CH); 7.53 (*s*, 1 H, CH=C); 7.36 (*dd*, *J*<sub>1</sub> = *J*<sub>2</sub> = 11.3, 1 H, CH); 7.10 (*dd*, *J*<sub>1</sub> = *J*<sub>2</sub> = 11.3, 1 H, CH); 6.85 (*d*, *J* = 12.4, 1 H, CH); 3.28 (*s*, 3 H, CH<sub>3</sub>). <sup>13</sup>C-NMR (75 MHz, CDCl<sub>3</sub>): 165.7 (C), 148.0 (C), 143.1 (C), 139.9 (C), 133.0 (CH), 132.2 (CH), 130.4 (C), 130.3 (CH), 129.7 (C), 123.5 (CH), 122.3 (CH), 119.4 (CH), 108.3 (CH), 26.0 (CH<sub>3</sub>). MS (EI): 280 (100, [M]<sup>+</sup>), 158 (21). HRMS (EI) calcd for C<sub>16</sub>H<sub>12</sub>N<sub>2</sub>O<sub>3</sub> ([M]<sup>+</sup>): 280.0848. Found: 280.0857.

*trans*-Isomer: <sup>1</sup>H-NMR (200 MHz, CDCl<sub>3</sub>): δ = 8.34 (*d*, *J* = 9.0, 1 H, CH); 7.81-7.77 (*m*, 2 H, CH, CH=C); 7.46-7.29 (*m*, 4 H, CH); 6.94-6.84 (*m*, 2 H, CH); 3.30 (*s*, 3 H, NCH<sub>3</sub>).

### 3-(4-Bromo-benzylidene)-1-methyl-1,3-dihydro-indol-2-one **8d**

According to GP 3 with **6a** (202 mg, 0.46 mmol) in DMF (5 mL) and KO<sup>t</sup>-Bu (62 mg, 0.55 mmol) and 4-bromobenzaldehyde (1.27 g, 6.9 mmol). After purification by FC (pentane/MTBE 4:1) **8d** (55 mg, 38%) was obtained as a mixture of isomers (*cis:trans* = 1:2.4) which were separated. *cis*-Isomer: M.p. 146 °C. IR (KBr): 3439br, 2826w, 1686s, 1605s, 1489m, 1469m, 1338m, 1091m, 743s. <sup>1</sup>H-NMR (300 MHz, CDCl<sub>3</sub>): δ = 8.18 (*d*, *J* = 8.5, 2 H, CH); 7.57-7.49 (*m*, 3 H, CH); 7.42 (*s*, 1 H, CH=C); 7.33-7.26 (*m*, 1 H, CH); 7.06 (*ddd*, *J*<sub>1</sub> = *J*<sub>2</sub> = 7.6, *J*<sub>3</sub> = 1.0, 1 H, CH); 6.81 (*d*, *J* = 7.8, 1 H, CH); 3.26 (*s*, 3 H, CH<sub>3</sub>). <sup>13</sup>C-NMR (75 MHz, CDCl<sub>3</sub>): 166.0 (C), 142.4 (C), 135.4 (CH), 133.4 (CH), 132.7 (CH), 129.4 (CH), 126.7 (C), 125.6 (C), 124.9 (C), 124.1 (C), 121.9 (CH), 119.0 (CH), 108.0 (CH), 25.9 (CH<sub>3</sub>). MS (EI): 303 (100, [M]<sup>+</sup>). HRMS (EI) calcd for C<sub>16</sub>H<sub>12</sub><sup>81</sup>BrNO ([M]<sup>+</sup>): 315.0083. Found: 315.0084.

*trans*-Isomer: <sup>1</sup>H-NMR (300 MHz, CDCl<sub>3</sub>): δ = 7.74 (*s*, 1 H, CH=C); 7.61-7.45 (*m*, 4 H, CH); 7.31-7.23 (*m*, 2 H, CH); 6.89 (*ddd*, *J*<sub>1</sub> = *J*<sub>2</sub> = 7.8, *J*<sub>3</sub> = 1.0, 1 H, CH); 6.83 (*d*, *J* = 7.8, 1 H, CH); 3.27 (*s*, 3 H, NCH<sub>3</sub>). <sup>13</sup>C-NMR (75 MHz, CDCl<sub>3</sub>): 168.1 (C), 144.3 (C), 135.3 (CH), 133.8 (C), 131.8 (CH), 130.7 (CH), 130.0 (CH), 127.7 (C), 124.2 (C), 123.5 (CH), 121.7 (CH), 120.7 (C), 108.2 (CH), 26.1 (CH<sub>3</sub>).

### 1-Methyl-3-(4-methyl-benzylidene)-1,3-dihydro-indol-2-one **8e**

According to GP 3 with **6a** (207 mg, 0.47 mmol) in DMF (5 mL) and KO<sup>t</sup>-Bu (63 mg, 0.56 mmol) and *p*-tolylaldehyde (1.12 g, 9.4 mmol). After purification by FC (pentane/MTBE 4:1) **8e** (50 mg, 43%) was obtained as a mixture of isomers (*cis:trans* = 1:2.3) which were separated. *cis*-Isomer: M.p. 134 °C. IR (KBr): 1677s, 1626w, 1606m, 1470w, 1385w, 1337w, 1089m, 1042m, 736m. <sup>1</sup>H-NMR (300 MHz, CDCl<sub>3</sub>): δ = 8.23 (*d*, *J* = 8.0, 2 H, CH); 7.50 (*d*, *J* = 5.1, 1 H, CH); 7.49 (*s*, 1 H, CH=C); 7.28-7.23 (*m*, 3 H, CH); 7.03 (*dd*, *J*<sub>1</sub> = *J*<sub>2</sub> = 7.6, 1 H, CH); 6.79 (*d*, *J* = 7.8, 1 H, CH); 3.26 (*s*, 3 H, NCH<sub>3</sub>); 2.40 (*s*, 3 H, CH<sub>3</sub>). <sup>13</sup>C-NMR (75 MHz, CDCl<sub>3</sub>): 166.1 (C), 142.1 (C), 141.1 (C), 137.2 (CH), 132.1 (CH), 129.4 (C), 129.0 (CH), 128.4 (CH), 125.0 (C), 124.5 (C), 121.7 (CH), 118.7 (CH), 107.7 (CH), 25.9 (CH<sub>3</sub>), 21.6 (CH<sub>3</sub>). MS (EI): 249 (100, [M]<sup>+</sup>), 248 (43), 158 (30). HRMS (EI) calcd for C<sub>17</sub>H<sub>15</sub>NO ([M]<sup>+</sup>): 249.1154. Found: 249.1158.

*trans*-Isomer: <sup>1</sup>H-NMR (300 MHz, CDCl<sub>3</sub>): δ = 7.82 (*s*, 1 H, CH=C); 7.69 (*d*, *J* = 7.6, 1 H, CH); 7.60 (*d*, *J* = 7.8, 2 H, CH); 7.27-7.22 (*m*, 3 H, CH); 6.88 (*dd*, *J*<sub>1</sub> = *J*<sub>2</sub> = 7.6, 1 H, CH); 6.78 (*d*, *J* = 7.8, 1 H, CH); 3.26 (*s*, 3 H, NCH<sub>3</sub>); 2.41 (*s*, 3 H, CH<sub>3</sub>). <sup>13</sup>C-NMR (75 MHz, CDCl<sub>3</sub>): 168.2 (C), 143.8 (C), 139.5 (C), 137.0 (CH), 131.7 (C), 129.1 (CH), 128.9 (CH), 128.8 (CH), 126.1 (C), 122.3 (CH), 121.3 (CH), 120.9 (C), 107.7 (CH), 25.7 (CH<sub>3</sub>), 21.2 (CH<sub>3</sub>).

### 3-(4-Methoxy-benzylidene)-1-methyl-1,3-dihydro-indol-2-one **8f**

According to GP 3 with **6a** (177 mg, 0.40 mmol) in DMF (5 mL) and KO<sup>t</sup>-Bu (54 mg, 0.48 mmol) and anisaldehyde (0.98 mL, 8.0 mmol). After purification by FC (pentane/MTBE 4:1) **8f** (55 mg, 52%) was obtained as a mixture of isomers (*cis:trans* = 1:1.9) which were separated. *cis*-Isomer: IR (film): 3436br, 1699s, 1601s, 1512s, 1469s, 1380m, 1252s, 1175s, 1099s, 1030s, 834s, 777s. <sup>1</sup>H-NMR (200 MHz, CDCl<sub>3</sub>): δ = 8.40 (*d*, *J* = 9.0, 2 H, CH); 7.52 (*d*, *J* = 1.0, 1 H, CH); 7.48 (*s*, 1 H, CH=C); 7.26 (*ddd*, *J*<sub>1</sub> = *J*<sub>2</sub> = 7.7, *J*<sub>3</sub> = 1.0, 1 H, CH); 7.03-6.94 (*m*, 3 H, CH); 6.79 (*d*, *J* = 8.0, 1 H, CH); 3.87 (*s*, 3 H, OCH<sub>3</sub>); 3.28 (*s*, 3 H, NCH<sub>3</sub>). <sup>13</sup>C-NMR (75 MHz, CDCl<sub>3</sub>): 161.6 (C), 141.9 (C), 137.0 (CH), 134.4 (CH), 131.4 (C), 128.1 (CH), 127.1 (C), 124.9 (C), 123.6 (C), 121.6 (CH), 118.4 (CH), 113.8 (CH), 107.7 (CH), 55.4 (CH<sub>3</sub>), 25.9 (CH<sub>3</sub>). MS (EI): 265 (100, [M]<sup>+</sup>), 222 (15), 165 (25). HRMS (EI) calcd for C<sub>17</sub>H<sub>15</sub>NO<sub>2</sub> ([M]<sup>+</sup>): 265.1103. Found: 265.1104.

*trans*-Isomer:  $^1\text{H}$ -NMR (300 MHz,  $\text{CDCl}_3$ ):  $\delta$  = 7.80 (*s*, 1 H,  $\text{CH}=\text{C}$ ); 7.75 (*d*,  $J$  = 7.1, 1 H, CH); 7.64 (*d*,  $J$  = 8.8, 2 H, CH); 7.30-7.23 (*m*, 1 H, CH); 7.05-6.82 (*m*, 4 H, CH); 3.87 (*s*, 3 H,  $\text{OCH}_3$ ); 3.28 (*s*, 3 H,  $\text{NCH}_3$ ).  $^{13}\text{C}$ -NMR (75 MHz,  $\text{CDCl}_3$ ): 168.9 (C), 160.8 (C), 144.0 (C), 137.4 (CH), 132.2 (CH), 129.3 (CH), 127.3 (C), 125.4 (C), 122.4 (CH), 121.7 (CH), 121.4 (C), 114.0 (CH), 108.1 (CH), 55.2 ( $\text{CH}_3$ ), 26.1 ( $\text{CH}_3$ ).

### 3-(2-Bromo-benzylidene)-1-methyl-1,3-dihydro-indol-2-one **8g**

According to GP 3 with **6a** (158 mg, 0.36 mmol) in DMF (5 mL) and  $\text{KOt-Bu}$  (48 mg, 0.43 mmol) and 2-bromobenzaldehyde (0.62 mL, 5.4 mmol) were added. After purification by FC (pentane/MTBE 4:1) **8g** (65 mg, 58%) was obtained as a mixture of isomers (*cis:trans* = 1:3.6) which were separated. *cis*-Isomer:  $^1\text{H}$ -NMR (200 MHz,  $\text{CDCl}_3$ ):  $\delta$  = 8.28 (*dd*,  $J_1$  = 7.8,  $J_2$  = 1.5, 1 H, CH); 7.75 (*s*, 1 H,  $\text{CH}=\text{C}$ ); 7.65-7.04 (*m*, 6 H, CH); 7.74 (*d*,  $J$  = 7.8, 1 H, CH); 3.23 (*s*, 3 H,  $\text{CH}_3$ ).

*trans*-Isomer: IR (film): 1702*s*, 1607*s*, 1468*s*, 1378*s*, 1336*s*, 1256*m*, 1099*s*, 1026*m*, 734*s*.  $^1\text{H}$ -NMR (200 MHz,  $\text{CDCl}_3$ ):  $\delta$  = 7.81 (*s*, 1 H,  $\text{CH}=\text{C}$ ); 7.73-7.64 (*m*, 2 H, CH); 7.43-7.23 (*m*, 4 H, CH); 6.83-6.79 (*m*, 2 H, CH); 3.28 (*s*, 3 H,  $\text{NCH}_3$ ).  $^{13}\text{C}$ -NMR (75 MHz,  $\text{CDCl}_3$ ): 167.8 (C), 144.4 (C), 135.6 (C), 135.4 (CH), 133.1 (CH), 130.9 (CH), 130.2 (CH), 130.0 (CH), 128.5 (C), 127.1 (CH), 124.0 (C), 122.8 (CH), 121.7 (CH), 120.8 (C), 107.9 (CH), 26.6 ( $\text{CH}_3$ ). MS (EI): 315 (3,  $[\text{M}]^+$ ), 234 (100), 219 (14). HRMS (EI) calcd for  $\text{C}_{16}\text{H}_{12}^{81}\text{BrNO}$  ( $[\text{M}]^+$ ): 315.0083. Found: 315.0090.

### 1-Methyl-3-(2-methyl-benzylidene)-1,3-dihydro-indol-2-one **8h**

According to GP 3 with **6a** (129 mg, 0.29 mmol) in DMF (5 mL) and  $\text{KOt-Bu}$  (39 mg, 0.35 mmol) and *o*-tolylaldehyde (0.51 mL, 4.4 mmol). After purification by FC (pentane/MTBE 4:1) **8h** (28 mg, 38%) was obtained as a mixture of isomers (*cis:trans* = 1:6) which were separated. *cis*-Isomer:  $^1\text{H}$ -NMR (300 MHz,  $\text{CDCl}_3$ ):  $\delta$  = 8.07 (*d*,  $J$  = 6.3, 1 H, CH); 7.75 (*s*, 1 H,  $\text{CH}=\text{C}$ ); 7.54 (*d*,  $J$  = 7.6, 1 H, CH); 7.33-7.22 (*m*, 4 H, CH); 7.06 (*dd*,  $J_1$  =  $J_2$  = 7.6, 1 H, CH); 6.82 (*d*,  $J$  = 7.8, 1 H, CH); 3.23 (*s*, 3 H,  $\text{NCH}_3$ ); 2.41 (*s*, 3 H,  $\text{CH}_3$ ).

*trans*-Isomer: IR (Film): 1710*s*, 1605*s*, 1467*s*, 1376*m*, 1336*w*, 774*s*, 752*s*, 735*s*.  $^1\text{H}$ -NMR (300 MHz,  $\text{CDCl}_3$ ):  $\delta$  = 7.92 (*s*, 1 H,  $\text{CH}=\text{C}$ ); 7.55 (*d*,  $J$  = 7.6, 1 H, CH); 7.34-7.22 (*m*, 5 H, CH); 6.85-6.80 (*m*, 2 H, CH); 3.29 (*s*, 3 H,  $\text{NCH}_3$ ); 2.35 (*s*, 3 H,  $\text{CH}_3$ ).  $^{13}\text{C}$ -NMR (75 MHz,

CDCl<sub>3</sub>): 168.0 (C), 143.9 (C), 137.1 (C), 136.1 (CH), 134.1 (C), 130.3 (CH), 129.4 (CH), 129.1 (CH), 128.3 (CH), 127.7 (C), 125.5 (CH), 122.7 (CH), 121.6 (CH), 121.1 (C), 107.8 (CH), 25.9 (CH<sub>3</sub>), 19.7 (CH<sub>3</sub>). MS (EI): 249 (80, [M]<sup>+</sup>), 232 (100), 205 (22), 124 (20). HRMS (EI) calcd for C<sub>17</sub>H<sub>15</sub>NO ([M]<sup>+</sup>): 249.1154. Found: 249.1152.

### 1-Methyl-3-pyridin-4-ylmethylene-1,3-dihydro-indol-2-one **9**

According to GP 3 with **6a** (195 mg, 0.44 mmol) in DMF (5 mL) and KOt-Bu (60 mg, 0.53 mmol) and 4-pyridincarboxaldehyde (0.74 mL, 7.8 mmol). After purification by FC (pentane/MTBE 4:1) **9** (50 mg, 48%) was obtained as a mixture of isomers (*cis:trans* = 1:2.3), which could not be separated. *Both isomers*: IR (Film): 2930<sub>w</sub>, 1706<sub>s</sub>, 1607<sub>s</sub>, 1488<sub>m</sub>, 1469<sub>s</sub>, 1414<sub>m</sub>, 1379<sub>m</sub>, 1338<sub>m</sub>, 1125<sub>m</sub>, 1102<sub>m</sub>, 742<sub>s</sub>. <sup>1</sup>H-NMR (200 MHz, CDCl<sub>3</sub>): δ = 8.72 (*d*, *J* = 6.8, 2 H, CH); 8.00 (*dd*, *J*<sub>1</sub> = 4.5, *J*<sub>2</sub> = 1.5, 1 H, CH); 7.54 (*s*, 1 H, CH=C); 7.51-7.29 (*m*, 3 H, CH); 6.92-6.79 (*m*, 2 H, CH); 3.28, 3.24 (2 *s*, 3 H, NCH<sub>3</sub>). <sup>13</sup>C-NMR (75 MHz, CDCl<sub>3</sub>): 167.6 (C), 150.3 (CH), 149.9 (CH), 144.7 (C), 143.0 (C), 142.9 (C), 140.5 (C), 132.8 (CH), 132.6 (CH), 130.9 (CH), 130.1 (CH), 124.6 (CH), 123.0 (CH), 122.9 (CH), 122.1 (CH), 121.9 (CH), 119.6 (CH), 108.4 (CH), 108.1 (CH), 26.1 (CH<sub>3</sub>), 25.8 (CH<sub>3</sub>). MS (EI): 236 (100, [M]<sup>+</sup>), 207 (12), 158 (74), 118 (55), 77 (10), 51 (13). HRMS (EI) calcd for C<sub>15</sub>H<sub>12</sub>N<sub>2</sub>O ([M]<sup>+</sup>): 236.0950. Found: 236.0950.

### 3-Benzylidene-5-methoxy-1-methyl-1,3-dihydro-indol-2-one **10**

According to GP 3 with **6b** (213 mg, 0.45 mmol) in DMF (5 mL) and KOt-Bu (61 mg, 0.54 mmol) and benzaldehyde (0.69 mL, 6.8 mmol). After purification by FC (pentane/MTBE 4:1) **10** (78 mg, 65%) was obtained as a mixture of isomers (*cis:trans* = 1:3.1) which were separated. *cis-Isomer*: IR (film): 3070<sub>w</sub>, 2942<sub>w</sub>, 2833<sub>w</sub>, 1694<sub>s</sub>, 1652<sub>m</sub>, 1593<sub>m</sub>, 1512<sub>m</sub>, 1439<sub>m</sub>, 1383<sub>s</sub>, 1345<sub>m</sub>, 1284<sub>s</sub>, 1230<sub>m</sub>, 1098<sub>m</sub>, 1042<sub>s</sub>, 760<sub>s</sub>, 455<sub>s</sub>. <sup>1</sup>H-NMR (300 MHz, CDCl<sub>3</sub>): δ = 8.23 (*d*, *J* = 7.6, 2 H, CH); 7.43 (*s*, 1 H, CH=C); 7.38-7.36 (*m*, 3 H, CH); 7.05 (*d*, *J* = 2.4, 1 H, CH); 6.77 (*dd*, *J*<sub>1</sub> = 8.3, *J*<sub>2</sub> = 2.5, 1 H, CH); 6.64 (*d*, *J* = 7.8, 1 H, CH); 3.78 (*s*, 3 H, OCH<sub>3</sub>); 3.18 (*s*, 3 H, NCH<sub>3</sub>). <sup>13</sup>C-NMR (75 MHz, CDCl<sub>3</sub>): 166.0 (C), 155.7 (C), 137.1 (CH), 136.5 (C), 133.8 (C), 130.4 (CH), 129.2 (CH), 128.2 (CH), 127.0 (C), 125.3 (C), 114.0 (CH), 108.2 (CH), 105.9 (CH), 56.0 (CH<sub>3</sub>), 25.9 (CH<sub>3</sub>). MS (EI): 303 (100, [M]<sup>+</sup>). HRMS (EI) calcd for C<sub>17</sub>H<sub>15</sub>NO<sub>2</sub> ([M]<sup>+</sup>): 265.1103. Found: 265.1099.

*trans*-Isomer:  $^1\text{H-NMR}$  (300 MHz,  $\text{CDCl}_3$ ):  $\delta$  = 8.10 (*s*, 1 H,  $\text{CH}=\text{C}$ ); 7.56-7.55 (*m*, 2 H, CH); 7.43-7.35 (*m*, 3 H, CH); 7.16 (*d*,  $J$  = 2.4, 1 H, CH); 6.83 (*dd*,  $J_1$  = 8.5,  $J_2$  = 2.7, 1 H, CH); 6.64 (*d*,  $J$  = 8.3, 1 H, CH); 3.61 (*s*, 3 H,  $\text{OCH}_3$ ); 3.19 (*s*, 3 H,  $\text{NCH}_3$ ).

### 3-Benzylidene-7-methoxy-1-methyl-1,3-dihydro-indol-2-one **11**

According to GP 3 with **6d** (151 mg, 0.32 mmol) in DMF (5 mL) and  $\text{KOt-Bu}$  (43 mg, 0.39 mmol) and benzaldehyde (0.48 mL, 4.8 mmol). After purification by FC (pentane/MTBE 4:1) **11** (36 mg, 42%) was obtained as a mixture of isomers (*cis:trans* = 1:2.6) which were separated. *cis*-Isomer:  $^1\text{H-NMR}$  (200 MHz,  $\text{CDCl}_3$ ):  $\delta$  = 8.29 (*m*, 2 H, CH); 7.52 (*s*, 1 H,  $\text{CH}=\text{C}$ ); 7.45-7.40 (*m*, 3 H, CH); 7.18 (*dd*,  $J_1$  = 7.1,  $J_2$  = 1.5, 1 H, CH); 6.98 (*dd*,  $J_1$  = 12.4,  $J_2$  = 11.3, 1 H, CH); 6.84 (*dd*,  $J_1$  = 12.4,  $J_2$  = 1.5, 1 H, CH); 3.86 (*s*, 3 H,  $\text{OCH}_3$ ); 3.55 (*s*, 3 H,  $\text{NCH}_3$ ).

*trans*-Isomer: IR (film): 1702*s*, 1608*m*, 1459*m*, 1446*m*, 1331*m*, 1254*s*, 1126*s*, 1071*s*, 1049*s*, 694*m*.  $^1\text{H-NMR}$  (200 MHz,  $\text{CDCl}_3$ ):  $\delta$  = 7.85 (*s*, 1 H,  $\text{CH}=\text{C}$ ); 7.64-7.59 (*m*, 2 H, CH); 7.50-7.39 (*m*, 3 H, CH); 7.22 (*d*,  $J$  = 1.8, 1 H, CH); 6.87-6.74 (*m*, 2 H, CH); 3.85 (*s*, 3 H,  $\text{OCH}_3$ ); 3.56 (*s*, 3 H,  $\text{NCH}_3$ ).  $^{13}\text{C-NMR}$  (75 MHz,  $\text{CDCl}_3$ ): 168.7 (C), 145.5 (C), 137.4 (CH), 135.1 (C), 129.4 (CH), 129.2 (CH), 128.6 (CH), 127.6 (C), 126.8 (C), 122.6 (C), 122.1 (CH), 115.9 (CH), 113.9 (CH), 56.1 ( $\text{CH}_3$ ), 29.6 ( $\text{CH}_3$ ). MS (EI): 265 (100,  $[\text{M}]^+$ ), 222 (19), 152 (21), 77 (12). HRMS (EI) calcd for  $\text{C}_{17}\text{H}_{15}\text{NO}_2$  ( $[\text{M}]^+$ ): 265.1103. Found: 265.1109.

### 3-Benzylidene-4-methoxy-1-methyl-1,3-dihydro-indol-2-one **12a** and 3-Benzylidene-6-methoxy-1-methyl-1,3-dihydro-indol-2-one **12b**

According to GP 3 with **6c** (216 mg, 0.46 mmol) in DMF (5 mL) and  $\text{KOt-Bu}$  (62 mg, 0.55 mmol) and benzaldehyde (0.80 mL, 8.0 mmol). After purification by FC (pentane/MTBE 4:1) **12a** and **12b** (106 mg, 87%, ratio 1.4:1) were obtained (the regioisomers were separated). **12a** was obtained as a mixture of isomers (*cis:trans* = 5:1). **12a**: *cis*-Isomer: M.p. 125 °C. IR (KBr): 2931*m*, 1692*s*, 1608*s*, 1473*s*, 1451*m*, 1264*s*, 1068*s*, 750*s*, 689*s*.  $^1\text{H-NMR}$  (300 MHz,  $\text{CDCl}_3$ ):  $\delta$  = 8.13 (*s*, 1 H,  $\text{CH}=\text{C}$ ); 8.12 (*m*, 2 H, CH); 7.42-7.34 (*m*, 3 H, CH); 7.22 (*d*,  $J$  = 8.0, 1 H, CH); 6.66 (*d*,  $J$  = 8.6, 1 H, CH); 6.49 (*d*,  $J$  = 7.1, 1 H, CH); 3.99 (*s*, 3 H,  $\text{OCH}_3$ ); 3.25 (*s*, 3 H,  $\text{NCH}_3$ ).  $^{13}\text{C-NMR}$  (75 MHz,  $\text{CDCl}_3$ ): 156.0 (C), 143.8 (C), 141.4 (CH), 134.9 (C), 131.5 (CH), 130.6 (C), 129.6 (CH), 129.5 (CH), 127.9 (CH), 126.5 (C), 126.9 (C), 105.3 (CH),



101.2 (CH), 55.5 (CH<sub>3</sub>), 26.0 (CH<sub>3</sub>). MS (EI): 265 (100, [M]<sup>+</sup>), 222 (20), 188 (45), 165 (32), 102 (15), 91 (28). HRMS (EI) calcd for C<sub>17</sub>H<sub>15</sub>NO<sub>2</sub> ([M]<sup>+</sup>): 265.1103. Found: 265.1093.

*trans*-Isomer: <sup>1</sup>H-NMR (300 MHz, CDCl<sub>3</sub>): δ = 7.95 (s, 1 H, CH=C); 7.38-7.25 (m, 6 H, CH); 6.66-6.51 (m, 2 H, CH); 3.45 (s, 3 H, OCH<sub>3</sub>); 3.25 (s, 3 H, NCH<sub>3</sub>).

**12b**: Tentatively assigned as *cis*-Isomer: IR (film): 2935m, 1708s, 1620s, 1505m, 1466s, 1382s, 1259s, 1229s, 1107s, 1057m, 700m. <sup>1</sup>H-NMR (300 MHz, CDCl<sub>3</sub>): δ = 7.70 (s, 1 H, CH=C); 7.63 (d, *J* = 8.3, 2 H, CH); 7.56 (d, *J* = 9.0, 1 H, CH); 7.48-7.41 (m, 3 H, CH); 6.40-6.37 (m, 2 H, CH); 3.83 (s, 3 H, OCH<sub>3</sub>); 3.26 (s, 3 H, NCH<sub>3</sub>). <sup>13</sup>C-NMR (75 MHz, CDCl<sub>3</sub>): 161.5 (C), 146.0 (C), 135.4 (C), 134.1 (CH), 131.5 (C), 129.2 (CH), 129.1 (CH), 128.5 (CH), 127.8 (C), 126.8 (C), 123.9 (CH), 105.8 (CH), 95.8 (CH), 55.5 (CH<sub>3</sub>), 26.1 (CH<sub>3</sub>). MS (EI): 265 (100, [M]<sup>+</sup>), 222 (17), 142 (24), 131 (30), 77 (16). HRMS (EI) calcd for C<sub>17</sub>H<sub>15</sub>NO<sub>2</sub> ([M]<sup>+</sup>): 265.1103. Found: 265.1098.

### 3-Benzyl-4-methoxy-1-methyl-1,3-dihydro-indol-2-one 13a

**12a** (41 mg, 0.16 mmol) was dissolved in MeOH (4 mL), then Pd/C (10 %) was added. After stirring for 18 h under an H<sub>2</sub>-atmosphere at normal pressure, the reaction mixture was filtered. Removal of the solvents afforded **13a** (26 mg, 62%) as a white solid. IR (KBr): 2931m, 1710s, 1608s, 1474s, 1455m, 1318m, 1262s, 1061s, 751s, 702s. <sup>1</sup>H-NMR (300 MHz, CDCl<sub>3</sub>): δ = 7.27 (s, 1 H, CH); 7.15 (dd, *J*<sub>1</sub> = *J*<sub>2</sub> = 8.3, 1 H, CH); 7.06-7.05 (m, 2 H, CH); 6.97-6.95 (m, 2 H, CH); 6.59 (d, *J* = 8.6, 1 H, CH); 6.27 (d, *J* = 7.8, 1 H, CH); 3.91 (s, 3 H, OCH<sub>3</sub>); 3.80 (m, 1 H, CHC(=O)); 3.47 (dd, *J*<sub>1</sub> = 13.4, *J*<sub>2</sub> = 5.3, 1 H, CH<sub>2</sub>); 3.37 (dd, *J*<sub>1</sub> = 13.2, *J*<sub>2</sub> = 4.4, 1H, CH<sub>2</sub>); 2.99 (s, 3 H, CH<sub>3</sub>). <sup>13</sup>C-NMR (75 MHz, CDCl<sub>3</sub>): 177.3 (C), 155.9 (C), 145.6 (C), 137.4 (C), 129.4 (CH), 127.6 (CH), 126.1 (CH), 114.0 (C), 105.8 (CH), 101.2 (CH), 96.0 (CH), 55.3 (CH<sub>3</sub>), 46.2 (CH), 34.2 (CH<sub>2</sub>), 26.1 (CH<sub>3</sub>). MS (EI): 267 (41, [M]<sup>+</sup>), 176 (100), 133 (23), 105 (11), 91 (34), 65 (20). HRMS (EI) calcd for C<sub>17</sub>H<sub>17</sub>NO<sub>2</sub> ([M]<sup>+</sup>): 267.1259. Found: 267.1267.

### 3-Benzyl-6-methoxy-1-methyl-1,3-dihydro-indol-2-one 13b

**12b** (43 mg, 0.16 mmol) was dissolved in MeOH (4 mL), then Pd/C (10 %) was added. After stirring for 18 h under an H<sub>2</sub>-atmosphere at normal pressure, the reaction mixture was filtered. Removal of the solvents afforded **13b** (34 mg, 78%) as an oil.

IR (film): 3437*br*, 1712*s*, 1626*s*, 1600*m*, 1506*m*, 1455*m*, 1378*s*, 1259*m*, 1230*m*, 910*s*, 700*m*.  
<sup>1</sup>H-NMR (300 MHz, CDCl<sub>3</sub>): δ = 7.29-7.15 (*m*, 5 H, CH); 6.57 (*d*, *J* = 8.0, 1 H, CH); 6.39 (*dx**d*, *J*<sub>1</sub> = 12.7, *J*<sub>2</sub> = 2.5, 1 H, CH); 6.34 (*d*, *J* = 2.2, 1 H, CH); 3.78 (*s*, 3 H, OCH<sub>3</sub>); 3.65 (*dx**d*, *J*<sub>1</sub> = 9.8, *J*<sub>2</sub> = 4.4, 1 H, CH<sub>2</sub>); 3.46 (*dx**d*, *J*<sub>1</sub> = 13.7, *J*<sub>2</sub> = 4.4, 1 H, CH<sub>2</sub>); 3.13 (*s*, 3 H, NCH<sub>3</sub>); 2.80 (*dx**d*, *J*<sub>1</sub> = 13.4, *J*<sub>2</sub> = 9.5, 1H, CHC(=O)). <sup>13</sup>C-NMR (75 MHz, CDCl<sub>3</sub>): 177.7 (C), 160.1 (C), 145.5 (C), 138.1 (C), 129.4 (CH), 128.4 (CH), 126.5 (CH), 125.1 (CH), 120.3 (C), 105.8 (CH), 96.0 (CH), 55.4 (CH<sub>3</sub>), 46.5 (CH), 37.1 (CH<sub>2</sub>), 26.1 (CH<sub>3</sub>). MS (EI): 267 (15, [M]<sup>+</sup>), 176 (100), 133 (10), 91 (22), 65 (8). HRMS (EI) calcd for C<sub>17</sub>H<sub>17</sub>NO<sub>2</sub> ([M]<sup>+</sup>): 267.1259. Found: 267.1262.

### 1-Benzyl-3-benzylidene-1,3-dihydro-indol-2-one 14

According to GP 3 with **6f** (146 mg, 0.28 mmol) in DMF (5 mL) and KO<sup>t</sup>Bu (38 mg, 0.34 mmol) and benzaldehyde (0.42 mL, 4.2 mmol). After purification by FC (pentane/MTBE 4:1) **14** (31 mg, 35%) was obtained as a mixture of isomers (*cis:trans* = 1:4.2) which were separated. *cis*-Isomer: <sup>1</sup>H-NMR (200 MHz, CDCl<sub>3</sub>): δ = 8.32 (*m*, 2 H, CH); 7.61-7.04 (*m*, 12 H, CH); 6.73 (*d*, *J* = 7.7, 1 H, CH); 5.00 (*s*, 2 H, NCH<sub>2</sub>).

*trans*-Isomer: IR (film): 3399*w*, 1705*s*, 1607*s*, 1481*m*, 1467*s*, 1384*s*, 1352*s*, 1179*s*, 778*m*, 748*s*, 698*s*. <sup>1</sup>H-NMR (300 MHz, CDCl<sub>3</sub>): δ = 7.94 (*s*, 1 H, CH=C); 7.67-7.62 (*m*, 2 H, CH); 7.49-7.42 (*m*, 3 H, CH); 7.34-7.25 (*m*, 6 H, CH); 7.16-7.11 (*m*, 1 H, CH); 6.84 (*ddd*, *J*<sub>1</sub> = *J*<sub>2</sub> = 7.6, *J*<sub>3</sub> = 1.3, 1 H, CH); 6.72 (*d*, *J* = 7.8, 1 H, CH); 5.01 (*s*, 2 H, NCH<sub>2</sub>). <sup>13</sup>C-NMR (75 MHz, CDCl<sub>3</sub>): 168.5 (C), 143.4 (C), 137.5 (CH), 136.0 (C), 135.0 (C), 129.7 (CH), 129.5 (CH), 129.3 (CH), 128.7 (CH), 128.6 (CH), 128.3 (C), 127.5 (CH), 127.3 (CH), 122.8 (CH), 121.8 (CH), 121.3 (C), 109.5 (CH), 44.2 (CH<sub>2</sub>). MS (EI): 311 (34, [M]<sup>+</sup>), 165 (16), 91 (100). HRMS (EI) calcd for C<sub>22</sub>H<sub>17</sub>NO ([M]<sup>+</sup>): 311.1310. Found: 311.1313.

### Literature

- [1] D. V. Patel, R. J. Schmidt, S. A. Biller, E. M. Gordon, S. S. Robinson and V. Manne, *J. Med. Chem.* **1995**, 38, 2906.
- [2] J. C. Birnbaum, B. Busche, Y. Lin, W. J. Shaw and G. E. Fryxell, *Chem. Commun.* **2002**, 1374.
- [3] J. Berluenga, A. M. Bayón and G. Asensio, *Chem. Commun.* **1983**, 1109.
- [4] J. Berluenga, A. M. Bayón and G. Asensio, *Chem. Commun.* **1984**, 1334.
- [5] S. R. Khan, A. Mhaka, R. Pili and J. T. Isaacs, *Bioor. Med. Chem. Let.* **2001**, 11, 451.
